# Supplementary material
Source: Springer Nature journal article supplement (https://www.springermedizin.de/resource/supplementary/13013_2006_24_MOESM4_ESM.pdf/9631026)

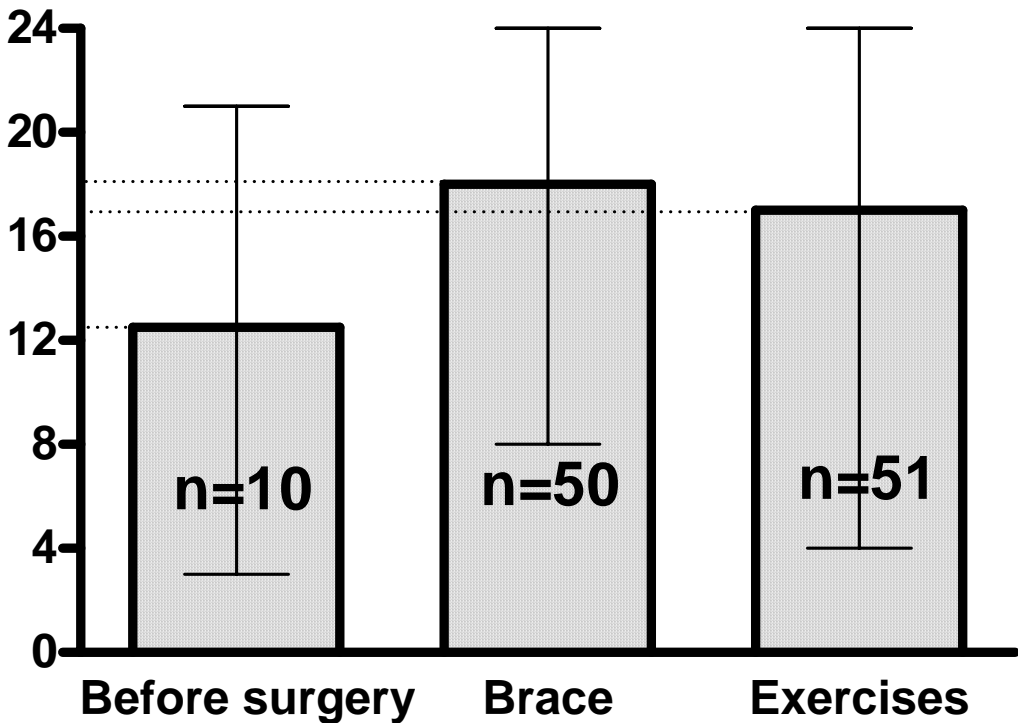

Supplement: MOESM4 [file 9631026]
